# Supplementary material for: Selective reduction of nitroaromatics to azoxy compounds on supported Ag–Cu alloy nanoparticles through visible light irradiation
Source: Royal Society of Chemistry journal article supplement (doi:10.1039/c5gc01726b), 2015-09-08
Supplement: c5gc01726b1.pdf [file c5gc01726b1.pdf]

## Electronic Supplementary Information

### Selective reduction of nitroaromatics to azoxycompounds on supported Ag-Cu alloy nanoparticles through visible light irradiation

Zhe Liu, Yiming Huang, Qi Xiao\* and Huaiyong Zhu

School of Chemistry, Physics and Mechanical Engineering, Science and Engineering Faculty, Queensland University of Technology, Brisbane, QLD 4001, Australia. E-mail: [q2.xiao@qut.edu.au](mailto:q2.xiao@qut.edu.au); Fax: +61 7 3138 1804; Tel: +61 7 3138 1581.

#### LEGENDS

**Table S1.** The quantified composition of Ag and Cu for catalysts with different ratios

**Table S2.** Performance of Ag-Cu (4-1)@ZrO<sub>2</sub> for reduction of nitrobenzene with different substituent groups

**Table S3.** Photocatalytic performance of pure Ag@ZrO<sub>2</sub> using various intermediates as reactant

**Table S4.** The amount of Ag and Cu in the supernatant liquid after in the recycle of catalyst as detected by ICP-AES analysis

**Scheme S1.** Possible reaction pathways for the reduction of nitrobenzene with pure Ag NPs

**Figure S1.** Energy dispersive spectrometer (EDX) spectrum for Ag-Cu (1-1)@ZrO<sub>2</sub> and Ag-Cu (1-4)@ZrO<sub>2</sub> sample from TEM

**Figure S2.** Scanning electron microscopy (SEM) analysis of the catalysts

**Figure S3.** The results of the hot filtration test

**Figure S4.** Transmission electron microscopy (TEM) analysis of the Ag NPs

**Table S1.** The quantified composition of Ag and Cu for catalysts with different ratios

| Entry | Mole ratio of Ag to Cu |                    | Weight ratio of Ag to Cu |                    |
|-------|------------------------|--------------------|--------------------------|--------------------|
|       | Experimental design    | TEM <sup>[a]</sup> | Experimental design      | SEM <sup>[b]</sup> |
| 1     | 4-1                    | 4.3-1.0            | 2.6-0.4                  | 2.65-0.35          |
| 2     | 1-1                    | 1.4-1.0            | 1.9-1.1                  | 1.97-1.03          |
| 3     | 1-4                    | 1.0-4.4            | 0.9-2.1                  | 1.05-1.95          |

[a] Determined from EDX spectrum and element mapping from TEM analysis in Figure 2e and Figure S2.

[b] Determined from EDX spectrum and elemental mapping from SEM analysis in Figure S3.

**Table S2.** Performance of Ag-Cu (4-1)@ZrO<sub>2</sub> for reduction of nitrobenzene with different substituent groups:

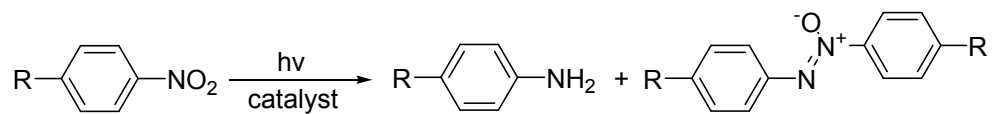

| Entry | R   | Conv. (%) (dark) | Select. (%) |       |
|-------|-----|------------------|-------------|-------|
|       |     |                  | Aniline     | Azoxy |
| 1     | Cl  | 80 (46)          | 11          | 89    |
| 2     | Br  | 70 (25)          | 29          | 71    |
| 3     | MeO | 50 (3)           | 29          | 71    |
| 4     | H   | 96 (16)          | 14          | 86    |

Reaction condition: photocatalyst 50 mg, reactant 0.5 mmol, 3 mL isopropyl alcohol (IPA) as solvent, 0.15 mmol KOH as base, 1 atm argon atmosphere, reaction temperature 60°C, reaction time 16 h and the light intensity was 0.8 W/cm<sup>2</sup>. The conversions and selectivity were analysed by gas chromatography (GC).

**Table S3.** Photocatalytic performance of pure Ag@ZrO<sub>2</sub> using various intermediates as reactant

| Entry            | Substrate                                                                         | Conv. (%) | Select. (%) |     |       |
|------------------|-----------------------------------------------------------------------------------|-----------|-------------|-----|-------|
|                  |                                                                                   |           | Aniline     | Azo | Azoxy |
| 1                | 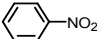 | 90        | 17          | 83  | 0     |
| 2 <sup>[a]</sup> | 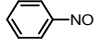 | 100       | 4           | 4   | 92    |
| 3 <sup>[a]</sup> | 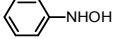 | 100       | 6           | 71  | 23    |
| 4 <sup>[a]</sup> | 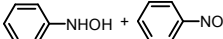 | 100       | 3           | 13  | 84    |
| 5                | 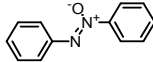 | 16        | 0           | 100 | 0     |
| 6                | 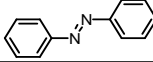 | 0         | -           | -   | -     |

Reaction condition: photocatalyst 50 mg, reactant 0.5 mmol, 3 mL IPA as solvent, 1 atm argon atmosphere, environment temperature 60°C, reaction time 16 h and the light intensity was 0.8 W/cm<sup>2</sup>. The conversions and selectivity were analysed by gas chromatography (GC). [a] reaction time 5 h.

**Table S4.** The amount of Ag and Cu in the supernatant liquid after in the recycle of catalyst as detected by ICP-AES analysis

| Entry | Runs | Amount of Ag (ppm) | Amount of Cu (ppm) |
|-------|------|--------------------|--------------------|
| 1     | 1    | 0.067              | 8.004              |
| 2     | 2    | 0.587              | 4.569              |
| 3     | 5    | 0.017              | 1.238              |
| 4     | 10   | 0.008              | 0.181              |

**Scheme S1.** Possible reaction pathways for the reduction of nitrobenzene with pure Ag NPs.

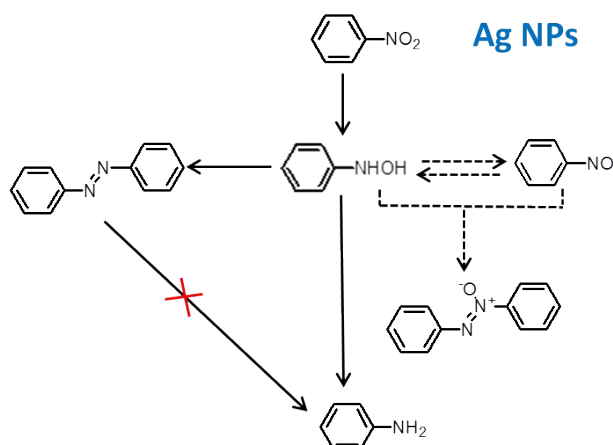

In the Ag NPs catalyst's case, we observed the same result as Ag-Cu NPs catalyst that azobenzene cannot be further reduced to aniline, it leads to same conclusion of formation of aniline and azo compound are parallel reactions (entry 6, Table S2). It was demonstrated Ag NPs cannot efficiently convert azoxybenzene into azobenzene (entry 5, Table S2), this phenomenon implies that in the reduction of nitrobenzene the great amount of azobenzene was not transferred from azoxybenzene but follows another pathway. On the other hand, when both nitrosobenzene and hydroxylamine was introduced into the reaction, we observed 84% yield of azoxybenzene (entry 4, Table S2). The reduction of nitrobenzene over Ag NPs catalyst cannot produce both nitrosobenzene and hydroxylamine otherwise azoxybenzene instead of azobenzene would have been observed. We separately investigated the reduction of nitrosobenzene and hydroxylamine and found reduction of hydroxylamine gives similar selectivity as the reduction of nitrobenzene only with faster reaction rate (entries 1 and 3, Table S2), however adverse selectivity was observed with nitrosobenzene (entry 2, Table S2). It illustrates the absence of nitrosobenzene as an intermediate in the reduction of nitrobenzene because if it exists stably in reaction system, azoxybenzene can be obtained as main product of coupling. Therefore, the complete reaction route of nitrobenzene reduction over Ag NPs catalyst is illuminated in Scheme S1.

**Figure S1.** The EDX spectrum from TEM

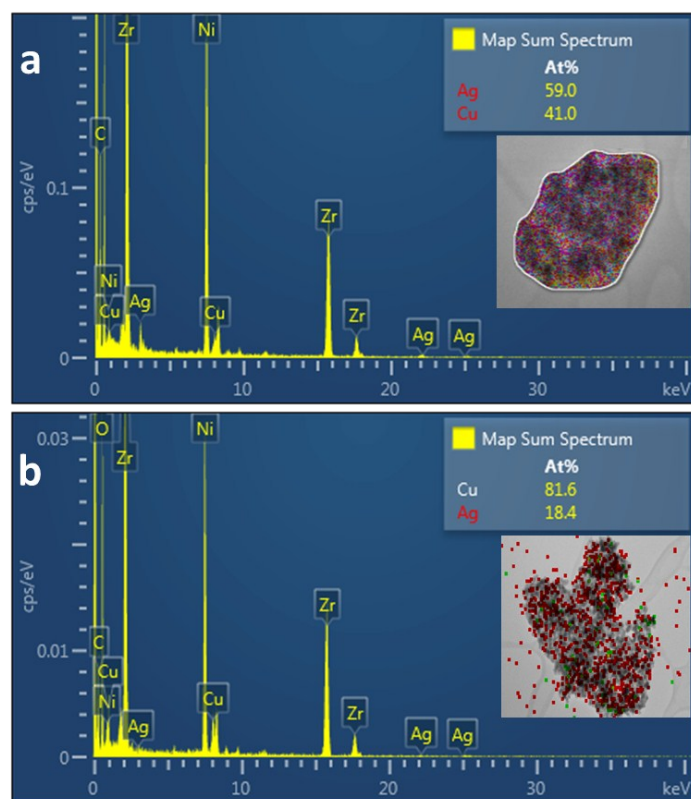

(a) EDX spectrum from TEM for Ag-Cu (1-1)@ZrO<sub>2</sub> samples. (b) EDX spectrum from TEM for Ag-Cu (1-4)@ZrO<sub>2</sub> samples

**Figure S2.** Scanning electron microscopy (SEM) analysis of the catalysts

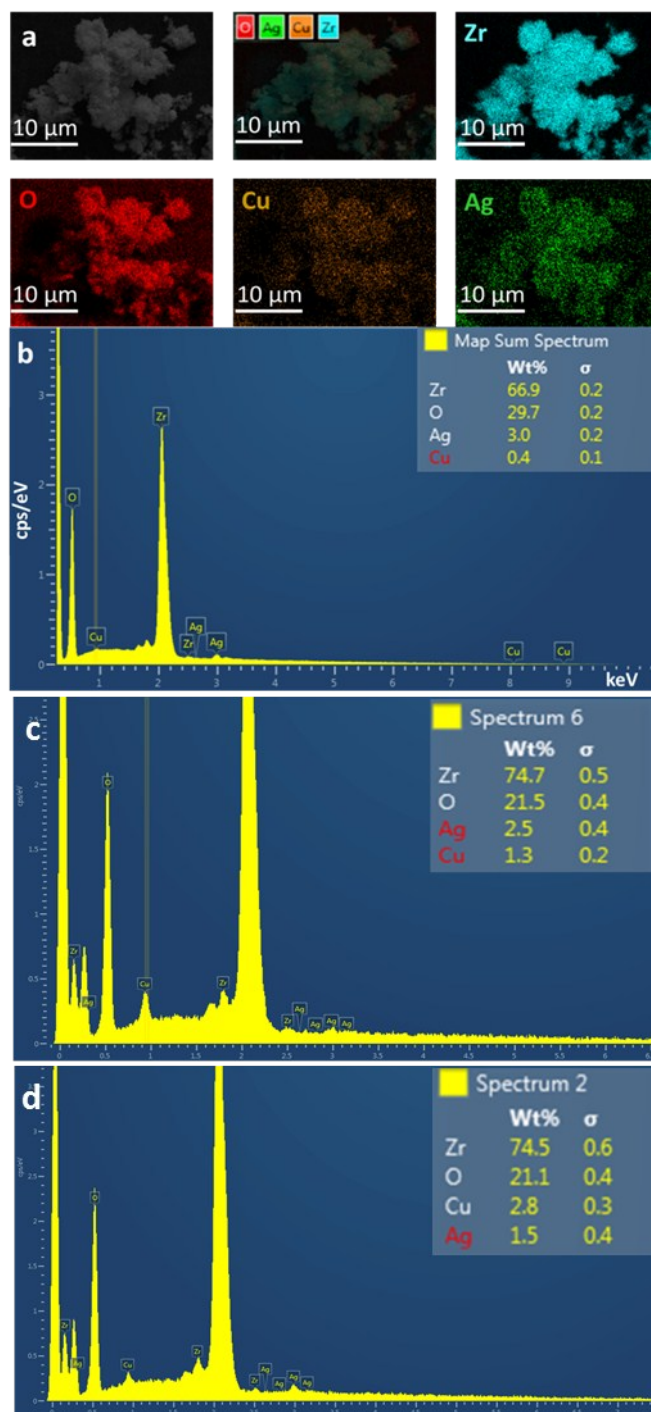

(a) SEM image of Ag-Cu (4-1) @ZrO<sub>2</sub> sample and the corresponding mapping of Zr, O, Cu and Ag elements. (b) EDX spectrum from SEM for Ag-Cu (4-1) @ZrO<sub>2</sub> sample. (c) EDX spectrum from SEM for Ag-Cu (1-1) @ZrO<sub>2</sub> sample. (d) EDX spectrum from SEM for Ag-Cu (4-1) @ZrO<sub>2</sub> sample.

**Figure S3.** The results of the hot filtration test

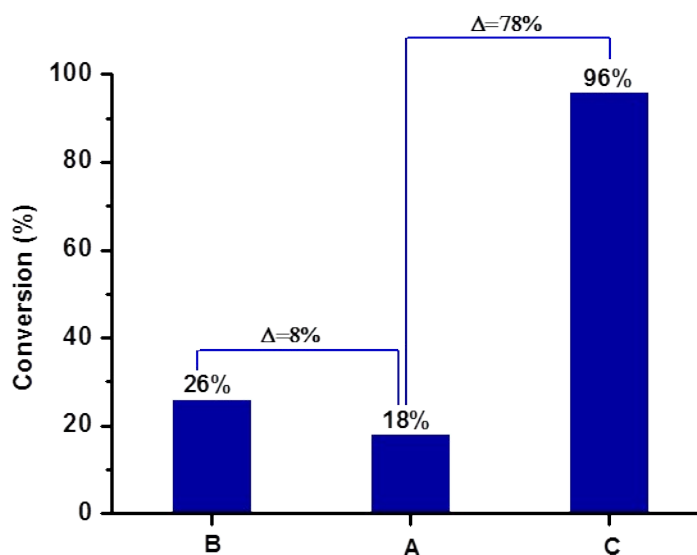

The reaction was interrupted at 1.0 h, and the catalyst was removed by filtration, the solution was labelled as A, 0.5 mL sample was collected for GC test. The rest solution without catalyst was re-irradiated as typical procedure, and after the reaction, sample was collected for GC test (labelled as B). After moving catalyst, the conversion for B increased by 8 % (from 18 % from 26 %). The conversion of typical reaction with catalyst (labelled C) was 96 %, which increased by 78 % from the first hour. It can be seen that the reaction did not proceed too much for the solution B, which means that the NPs peeled off from catalyst has little effect to the reaction. Moreover, from the reusability of Ag-Cu alloy NPs (Figure 9 in main text), we can also confirm that the catalytic activity doesn't lose too much during the reaction. Overall the main contribution of the activity results from the photocatalytic response of heterogeneous Ag-Cu alloy NPs.

**Figure S4.** Transmission electron microscopy (TEM) analysis of the Ag NPs

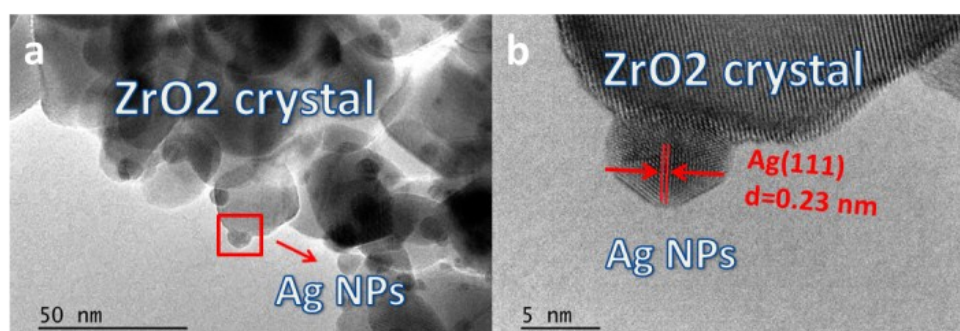

(a) TEM image of the Ag@ZrO<sub>2</sub> samples. (b) HR-TEM image of Ag particle indicated in part a (red square).
